# Supplementary material for: Facile synthesis of ZnO/CdS@ZIF-8 core–shell nanocomposites and their applications in photocatalytic degradation of organic dyes
Source: Royal Society of Chemistry journal article supplement (doi:10.1039/c7ra03918b), 2017-01-01
Supplement: c7ra03918b1.pdf [file c7ra03918b1.pdf]

## **Facile Synthesis of ZnO/CdS@ZIF-8 Core-Shell Nanocomposites and Their Applications in Photocatalytic Degradation of Organic Dyes**

Rong-Mei Kong,<sup>a</sup> Yan Zhao,<sup>a</sup> Yiqun Zheng<sup>b</sup> and Fengli Qu<sup>a,\*</sup>

*<sup>a</sup>College of Chemistry and Chemical Engineering, Qufu Normal University, Qufu  
273165, Shandong, P. R. China*

*<sup>b</sup>National Engineering Research Center for Colloidal Materials, Shandong  
University, Jinan 250000, Shandong, P. R. China*

\*Corresponding author: Prof. F. Qu

Email: [fengliqun@hotmail.com](mailto:fengliqun@hotmail.com), Tel/fax: (+86) 537-4456301

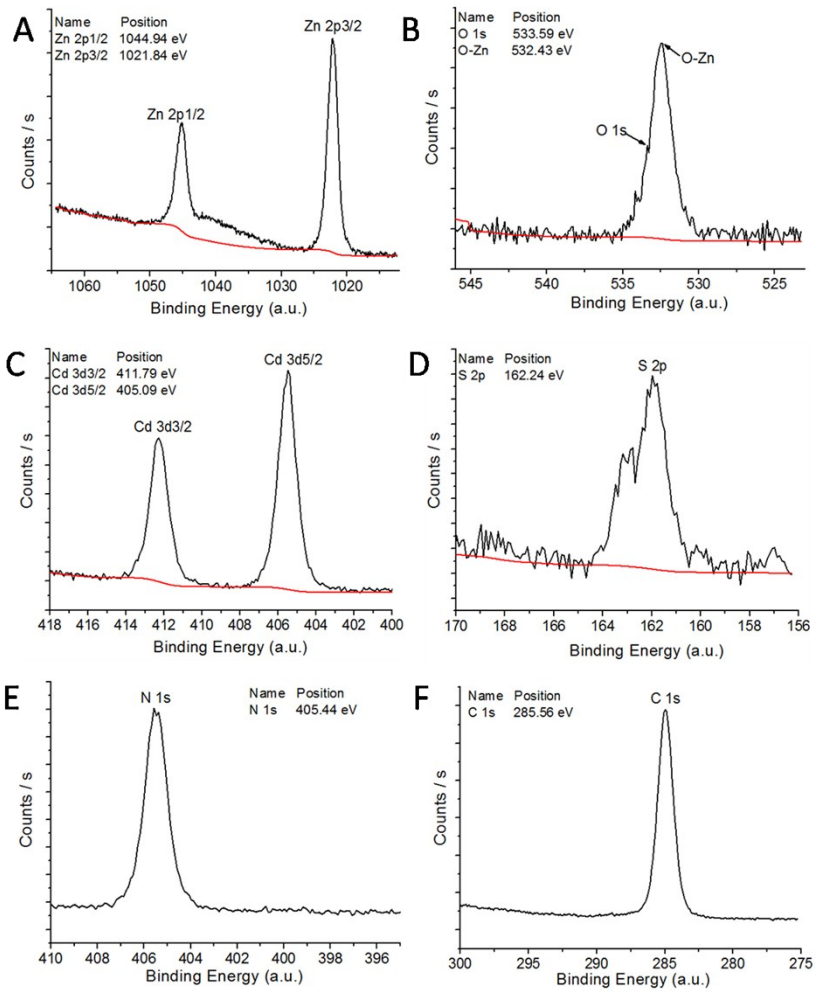

**Fig. S1.** High-resolution XPS element spectrum of ZnO/CdS@ZIF-8.

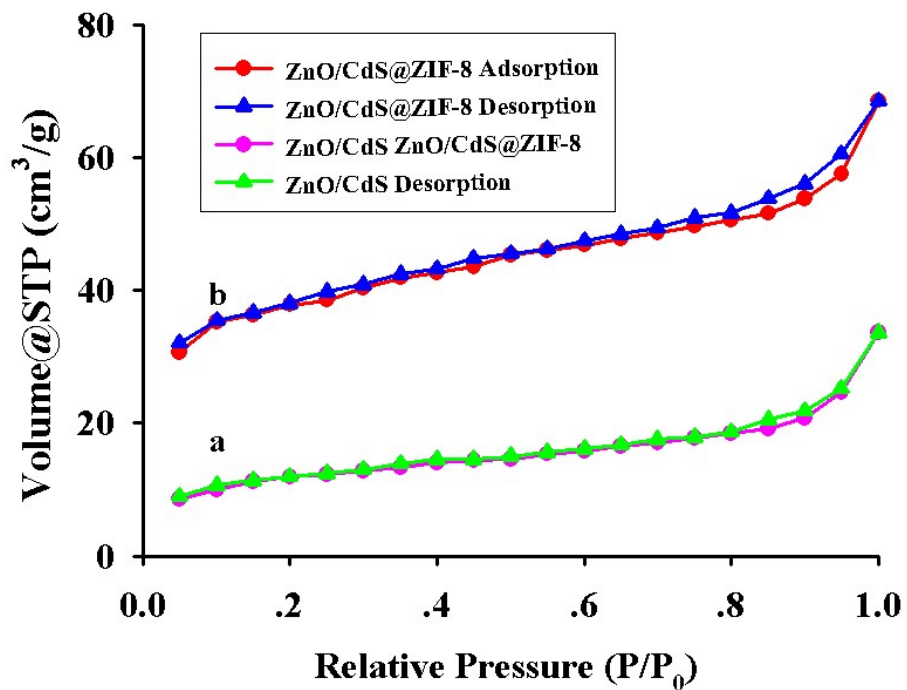

**Fig. S2.** Nitrogen adsorption-desorption isotherm of (a) ZnO/CdS and (b) ZnO/CdS@ZIF-8.

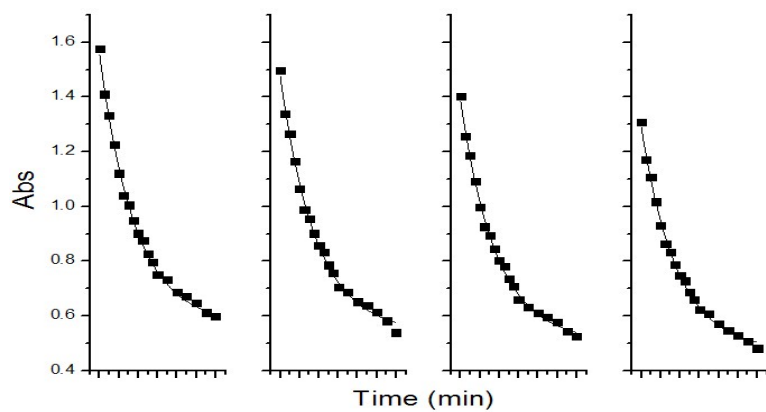

**Fig. S3.** Recyclability of the ZnO/CdS@ZIF-8 nanocomposites for the photocatalytic degradation of RhB.

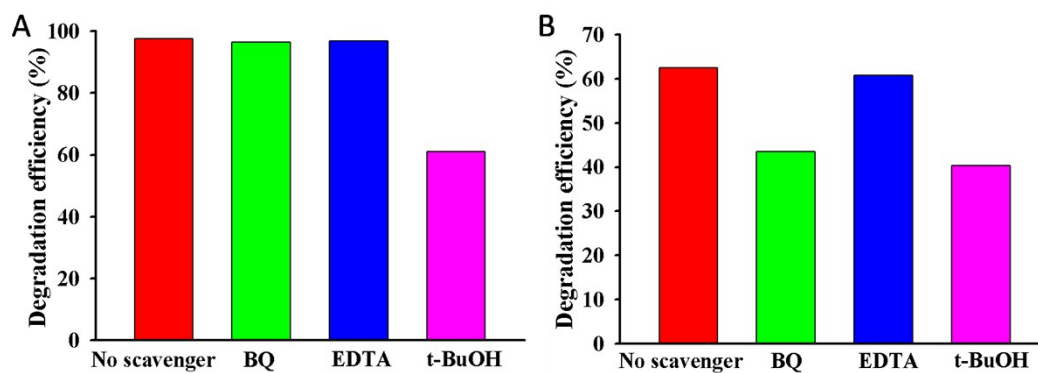

**Fig. S4.** Photocatalytic degradation efficiencies of ZnO/CdS@ZIF-8 for (A) MB and (B) RhB in the presence of scavengers (the concentration of the scavengers were all 10 mM).
